# Supplementary material for: Bell’s Palsy and COVID-19 Vaccines: A Systematic Review and Meta-Analysis
Source: MDPI journal article supplement (doi:10.3390/vaccines11020236), 2023-01-20
Supplement: s1 [file s1]

**Table S1 shows quality Assessment of included Cases Reports using (JBI) Quality Assessment Tool.**

| Study ID                  | The Joanna Briggs Institute (JBI) Critical Appraisal checklist for Case Reports |                                                                          |                                                                                      |                                                                                |                                                                      |                                                                 |                                                                               |                                                | Quality (Total Quality Score) | Risk Of Bias | Final Appraisal |
|---------------------------|---------------------------------------------------------------------------------|--------------------------------------------------------------------------|--------------------------------------------------------------------------------------|--------------------------------------------------------------------------------|----------------------------------------------------------------------|-----------------------------------------------------------------|-------------------------------------------------------------------------------|------------------------------------------------|-------------------------------|--------------|-----------------|
|                           | Were the patient's demographic characteristics clearly described?               | Was the patient's history clearly described and presented as a timeline? | Was the current clinical condition of the patient on presentation clearly described? | Were diagnostic tests or assessment methods and the results clearly described? | Was the intervention(s) or treatment procedure(s) clearly described? | Was the post-intervention clinical condition clearly described? | Were adverse events (harms) or unanticipated events identified and described? | Does the case report provide takeaway lessons? |                               |              |                 |
| Burrows 2021 [1]          | YES                                                                             | YES                                                                      | YES                                                                                  | YES                                                                            | YES                                                                  | YES                                                             | NO                                                                            | YES                                            | 88%                           | High         | Include         |
| Cellina 2022 [2]          | YES                                                                             | YES                                                                      | YES                                                                                  | YES                                                                            | YES                                                                  | YES                                                             | NO                                                                            | YES                                            | 88%                           | High         | Include         |
| Čenšćák 2021 [3]          | YES                                                                             | YES                                                                      | YES                                                                                  | YES                                                                            | YES                                                                  | YES                                                             | NO                                                                            | YES                                            | 88%                           | High         | Include         |
| Cirillo 2022 [4]          | NO                                                                              | NO                                                                       | YES                                                                                  | YES                                                                            | YES                                                                  | YES                                                             | NO                                                                            | YES                                            | 62.50 %                       | Mode rate    | Include         |
| Colella 2021 [5]          | YES                                                                             | YES                                                                      | YES                                                                                  | NO                                                                             | YES                                                                  | YES                                                             | NO                                                                            | YES                                            | 75%                           | High         | Include         |
| Ercoli 2021 [6]           | Yes                                                                             | YES                                                                      | YES                                                                                  | YES                                                                            | YES                                                                  | YES                                                             | NO                                                                            | YES                                            | 88%                           | High         | Include         |
| Finsterer 2021 [7]        | Yes                                                                             | YES                                                                      | YES                                                                                  | YES                                                                            | YES                                                                  | YES                                                             | NO                                                                            | YES                                            | 88%                           | High         | Include         |
| Iftikhar 2021 [8]         | YES                                                                             | YES                                                                      | YES                                                                                  | YES                                                                            | YES                                                                  | YES                                                             | NO                                                                            | YES                                            | 88%                           | High         | Include         |
| Introna 2021 [9]          | YES                                                                             | YES                                                                      | YES                                                                                  | YES                                                                            | YES                                                                  | YES                                                             | NO                                                                            | YES                                            | 88%                           | High         | Include         |
| Ish 2021 [10]             | YES                                                                             | NO                                                                       | YES                                                                                  | NO                                                                             | YES                                                                  | YES                                                             | NO                                                                            | YES                                            | 62.50 %                       | Mode rate    | Include         |
| Manea 2021 [11]           | YES                                                                             | YES                                                                      | YES                                                                                  | YES                                                                            | YES                                                                  | YES                                                             | NO                                                                            | YES                                            | 88%                           | High         | Include         |
| Martin-Villares 2021 [12] | NO                                                                              | YES                                                                      | YES                                                                                  | YES                                                                            | NO                                                                   | YES                                                             | NO                                                                            | YES                                            | 75%                           | High         | Include         |
| Mason 2021                | YES                                                                             | NO                                                                       | YES                                                                                  | YES                                                                            | YES                                                                  | YES                                                             | NO                                                                            | YES                                            | 75%                           | High         | Include         |

|                      |     |     |     |     |     |     |    |     |         |          |         |
|----------------------|-----|-----|-----|-----|-----|-----|----|-----|---------|----------|---------|
| [13]                 |     |     |     |     |     |     |    |     |         |          |         |
| Mussatto 2021 [14]   | YES | NO  | YES | YES | YES | YES | NO | YES | 75%     | High     | Include |
| Nasuelli 2021 [15]   | YES | NO  | YES | YES | YES | YES | NO | YES | 75%     | High     | Include |
| Nishizawa 2021 [16]  | YES | YES | YES | YES | NO  | NO  | NO | YES | 62.50 % | Moderate | Include |
| Obermann 2021 [17]   | YES | YES | YES | YES | YES | YES | NO | YES | 88%     | High     | Include |
| Pothiawala 2021 [18] | YES | YES | YES | NO  | YES | NO  | NO | YES | 62.50 % | Moderate | Include |
| Poudel 2022 [19]     | YES | NO  | YES | YES | YES | YES | NO | YES | 75%     | High     | Include |
| Repajic 2021 [20]    | YES | YES | YES | NO  | YES | YES | NO | YES | 75%     | High     | Include |
| Shalabi 2022 [21]    | YES | NO  | YES | YES | YES | YES | NO | YES | 75%     | High     | Include |
| Yu 2021 [22]         | YES | NO  | YES | YES | YES | YES | NO | YES | 75%     | High     | Include |
| Zhang 2022 [23]      | YES | NO  | YES | NO  | YES | YES | NO | YES | 62.50 % | Moderate | Include |

**Low risk:** 75-100%, **Moderate:** 50-74%, **High risk** <50%, **include** Moderate and Low risk of bias and **exclude** High risk of bias.

**Table S2: shows quality Assessment of included Cases series studies using (NIH) Quality Assessment Tool.**

| Study ID | NIH Quality Assessment Tool for Case Series Studies Criteria Met |                                                                                   |                             |                               |                                         |                                                                                           |                                       |                                              |                                  | Quality (Total Quality Score) |
|----------|------------------------------------------------------------------|-----------------------------------------------------------------------------------|-----------------------------|-------------------------------|-----------------------------------------|-------------------------------------------------------------------------------------------|---------------------------------------|----------------------------------------------|----------------------------------|-------------------------------|
|          | Was the study question or objective clearly stated?              | Was the study population clearly and fully described, including a case definition | Were the cases consecutive? | Were the subjects comparable? | Was the intervention clearly described? | Were the outcome measures clearly defined, valid, reliable, and implemented consistently? | Was the length of follow-up adequate? | Were the statistical methods well-described? | Were the results well-described? |                               |

|                        |     | n?  |     |     |     | tly across<br>all study<br>participa<br>nts? |     |    |     |           |
|------------------------|-----|-----|-----|-----|-----|----------------------------------------------|-----|----|-----|-----------|
| Andreozzi 2022 [24]    | YES | YES | NA  | YES | YES | YES                                          | NA  | NO | YES | 6 (Fair ) |
| Castiglionea 2022 [25] | YES | YES | YES | YES | YES | YES                                          | NA  | NO | YES | 7 (Good)  |
| Correa 2021 [26]       | YES | YES | NA  | NO  | YES | YES                                          | NO  | NO | YES | 5 (Fair)  |
| Hamid 2022 [27]        | YES | YES | NA  | NO  | YES | YES                                          | NA  | NO | YES | 6 (Fair)  |
| James 2021 [28]        | YES | YES | NA  | YES | YES | YES                                          | YES | NO | YES | 7 (Fair)  |
| Mirmosayyeb 2021 [29]  | YES | YES | NA  | NO  | YES | YES                                          | NO  | NO | YES | 5 (Fair)  |
| Shemer 2021 [30]       | YES | NO  | YES | YES | NO  | YES                                          | NA  | NO | YES | 5 (Fair)  |

**NA:** Not Applicable, **Good:** Met 7-9 criteria, **Fair:** Met 4-6 Criteria, **Poor:** Met 0-3 Criteria, **JB** = Joanna Briggs Institute.

**Table S3 shows quality Assessment of included self-controlled Cases series studies using (NIH) Quality Assessment Tool.**

| Study ID | NIH Quality Assessment Tool for Case Series Studies Criteria Met |                                                                                    |                             |                               |                                         |                                                                                                           |                                       |                                              |                                  | Quality (Total Quality Score) |
|----------|------------------------------------------------------------------|------------------------------------------------------------------------------------|-----------------------------|-------------------------------|-----------------------------------------|-----------------------------------------------------------------------------------------------------------|---------------------------------------|----------------------------------------------|----------------------------------|-------------------------------|
|          | Was the study question or objective clearly stated?              | Was the study population clearly and fully described, including a case definition? | Were the cases consecutive? | Were the subjects comparable? | Was the intervention clearly described? | Were the outcome measures clearly defined, valid, reliable, and implemented consistently across all study | Was the length of follow-up adequate? | Were the statistical methods well-described? | Were the results well-described? |                               |

|                  |     |     |     |    |     | participa<br>nts? |     |     |     |           |
|------------------|-----|-----|-----|----|-----|-------------------|-----|-----|-----|-----------|
| Patone 2021 [31] | YES | YES | YES | NO | YES | YES               | YES | YES | YES | 9 (Good)  |
| Rahman 2022 [32] | YES | YES | YES | NO | YES | YES               | YES | YES | YES | 10 (Good) |
| Walker 2022 [33] | YES | YES | YES | NO | YES | YES               | YES | YES | YES | 11 (Good) |
| Wan1 2022 [34]   | YES | YES | YES | NO | YES | YES               | YES | YES | YES | 12 (Good) |
| Wan2 2022 [35]   | YES | YES | YES | NO | YES | YES               | YES | YES | YES | 13 (Good) |

**Table S4: shows quality Assessment of included Cohort studies using (NOS) Quality Assessment Tool.**

| Study ID                   | NOS (Cohort )(Non-coded)                                  |                                                   |                                         |                                                                                                                         |                                                                                                                               |                              |                                                                       |                                               |                   |                      |
|----------------------------|-----------------------------------------------------------|---------------------------------------------------|-----------------------------------------|-------------------------------------------------------------------------------------------------------------------------|-------------------------------------------------------------------------------------------------------------------------------|------------------------------|-----------------------------------------------------------------------|-----------------------------------------------|-------------------|----------------------|
|                            | Selection                                                 |                                                   |                                         |                                                                                                                         | compar<br>ability                                                                                                             | outcome                      |                                                                       |                                               | Outcom<br>e score | Overall<br>Appraisal |
|                            | Represe<br>ntativen<br>ess of<br>the<br>exposed<br>cohort | Selectio<br>n of the<br>non-<br>exposed<br>cohort | Ascertain<br>ment<br>of<br>Exposur<br>e | Demons<br>tration<br>that that<br>outcome<br>of<br>interest<br>was not<br>present<br>at the<br>start of<br>the<br>study | compar<br>ability<br>Of<br>cohorts<br>on the<br>basis of<br>design<br>or<br>analysis<br>controlle<br>d for<br>confoun<br>ders | Assess<br>ment of<br>outcome | was<br>follow<br>up long<br>enough<br>for<br>outcome<br>s to<br>occur | Adequa<br>cy of<br>follow<br>up of<br>cohorts |                   |                      |
| Bardenheier 1<br>2021 [36] | *                                                         | *                                                 | *                                       | *                                                                                                                       | *                                                                                                                             | *                            | *                                                                     | 0                                             | 7/9               | Good                 |
| Bardenheier 2<br>2021 [37] | *                                                         | 0                                                 | -                                       | *                                                                                                                       | *                                                                                                                             | *                            | *                                                                     | 0                                             | 6/9               | Good                 |

|                    |   |   |   |   |   |   |   |   |     |      |
|--------------------|---|---|---|---|---|---|---|---|-----|------|
| Clemens 2022 [38]  | * | * | * | * | * | * | 0 | 0 | 6/9 | Fair |
| Frontera 2021 [39] | * | * | * | 0 | * | * | 0 | 0 | 5/9 | Poor |
| Huh 2021 [40]      | 0 | 0 | * | 0 | 0 | * | 0 | 0 | 2/9 | Poor |
| Kant 2022 [41]     | * | * | 0 | * | 0 | 0 | * | 0 | 4/9 | Poor |
| Koh 2021 [42]      | * | * | * | * | 0 | * | * | 0 | 6/9 | Poor |
| Lai 2022 [43]      | 0 | * | * | * | * | * | * | 0 | 6/9 | Good |
| Li 2022 [44]       | * | * | * | 0 | * | * | * | 0 | 6/9 | Good |
| Nasreen 2022 [45]  | 0 | * | * | * | 0 | * | * | 0 | 5/9 | poor |
| Shibli 2021 [46]   | * | 0 | * | * | * | * | * | 0 | 6/9 | Good |
| Wong 2021 [47]     | 0 | * | * | * | * | * | * | 0 | 6/9 | Good |
| Xu 2022 [48]       | * | * | * | 0 | 0 | * | * | 0 | 5/9 | Poor |

**Good quality:** 3 or 4 stars in selection domain AND 1 or 2 in Comparability domain AND 2 or 3 stars in outcome domain, **Fair quality:** 2 stars in selection domain AND 1 or 2 in Comparability domain AND 2 or 3 stars in outcome domain, **Poor quality:** 0 stars in selection domain AND 0 in Comparability domain AND 0 or 1 stars in outcome domain

**Table S5: shows quality Assessment of included Case-control studies using (NOS) Quality Assessment Tool.**

| Study ID | NOS (Case-control ) Coded         |                             |                       |                        |                                                                        |                       |                                                 |                                  |               |                   |
|----------|-----------------------------------|-----------------------------|-----------------------|------------------------|------------------------------------------------------------------------|-----------------------|-------------------------------------------------|----------------------------------|---------------|-------------------|
|          | Selection                         |                             |                       |                        | comparability                                                          | outcome               |                                                 |                                  | Outcome score | Overall Appraisal |
|          | Is the case definition adequate ? | Representativeness of cases | Selection of Controls | Definition of controls | comparability of cases and controls on the basis of design or analysis | Assessment of outcome | was follow up long enough for outcomes to occur | Adequacy of follow up of cohorts |               |                   |

|                  |   |   |   |   | controlle<br>d for<br>confoun<br>ders |   |   |   |     |      |
|------------------|---|---|---|---|---------------------------------------|---|---|---|-----|------|
| Nosedá 2021 [49] | * | * | 0 | * | *                                     | * | * | 0 | 6/9 | Good |

**Good quality:** 3 or 4 stars in selection domain AND 1 or 2 in Comparability domain AND 2 or 3 stars in outcome domain, **Fair quality:** 2 stars in selection domain AND 1 or 2 in Comparability domain AND 2 or 3 stars in outcome domain, **Poor quality:** 0 stars in selection domain AND 0 in Comparability domain AND 0 or 1 stars in outcome domain

**Table S6: shows quality Assessment of included cross sectional studies using (NOS) Quality Assessment Tool.**

| Study ID | NOS (Cross-sectional ) (non-coded ) |               |         |        |         |
|----------|-------------------------------------|---------------|---------|--------|---------|
|          | Selection                           | comparability | outcome | Outcom | Overall |

|                       | Representativeness of the sample | sample size | Non-response | Ascertainment of the exposure (risk factor) | The subjects in different outcome groups are comparable, based on the study design and analysis . Confounding factors are controlled | Assessment of outcome | Statistical test | Score | Appraisal |
|-----------------------|----------------------------------|-------------|--------------|---------------------------------------------|--------------------------------------------------------------------------------------------------------------------------------------|-----------------------|------------------|-------|-----------|
| El-Shitany1 2022 [50] | *                                | *           | 0            | **                                          | *                                                                                                                                    | *                     | *                | 7/8   | Good      |
| El-Shitany2 2022 [51] | *                                | *           | 0            | **                                          | *                                                                                                                                    | *                     | *                | 7/8   | Good      |
| Mohammed 2021 [52]    | *                                | *           | 0            | **                                          | *                                                                                                                                    | *                     | *                | 7/8   | Good      |

**Good quality:** 3 or 4 stars in selection domain AND 1 or 2 in Comparability domain AND 2 or 3 stars in outcome domain, **Fair quality:** 2 stars in selection domain AND 1 or 2 in Comparability domain AND 2 or 3 stars in outcome domain, **Poor quality:** 0 stars in selection domain AND 0 in Comparability domain AND 0 or 1 stars in outcome domain

## References

- Burrows, A.; Bartholomew, T.; Rudd, J.; Walker, D. Sequential contralateral facial nerve palsies following COVID-19 vaccination first and second doses. *BMJ Case Rep.* **2021**, *14*, doi:10.1136/bcr-2021-243829.
- Cellina, M.; D'Arrigo, A.; Floridi, C.; Oliva, G.; Carrafiello, G. Left Bell's palsy following the first dose of mRNA-1273 SARS-CoV-2 vaccine: A case report. *Clin. Imaging* **2022**, *82*, 1–4, doi:10.1016/j.clinimag.2021.10.010.
- Čenščák, D.; Ungermann, L.; Štětkářová, I.; Ehler, E. Guillan-Barré Syndrome after First Vaccination Dose against COVID-19: Case Report. *Acta Medica (Hradec Kralove)* **2021**, *64*, 183–186, doi:10.14712/18059694.2021.31.
- Cirillo, N.; Orlandi, M.; Colella, G. Patients with post-COVID-19 vaccination facial palsy: To boost or not to boost? *Transl. Neurosci.* **2022**, *13*, 236–239, doi:10.1515/tnsci-2022-0240.
- Colella, G.; Orlandi, M.; Cirillo, N. Bell's palsy following COVID-19 vaccination. *J. Neurol.* **2021**, *268*, 3589–3591, doi:10.1007/s00415-021-10462-4.
- Ercoli, T.; Lutzoni, L.; Orofino, G.; Muroli, A.; Defazio, G. Functional neurological disorder after COVID-19 vaccination. *Neurol. Sci.* **2021**, *42*, 3989–3990, doi:10.1007/s10072-021-05504-8.
- Finsterer, J. Exacerbating Guillain-Barré Syndrome Eight Days after Vector-Based COVID-19

- Vaccination. *Case Rep. Infect. Dis.* **2021**, 2021, 3619131, doi:10.1155/2021/3619131.
8. Iftikhar, H.; Noor, S.M.U.; Masood, M.; Bashir, K. Bell's Palsy After 24 Hours of mRNA-1273 SARS-CoV-2 Vaccine. *Cureus* **2021**, 13, e15935, doi:10.7759/cureus.15935.
  9. Introna, A.; Caputo, F.; Santoro, C.; Guerra, T.; Ucci, M.; Mezzapesa, D.M.; Trojano, M. Guillain-Barré syndrome after AstraZeneca COVID-19-vaccination: A causal or casual association? *Clin. Neurol. Neurosurg.* **2021**, 208, 106887, doi:10.1016/j.clineuro.2021.106887.
  10. Ish, S.; Ish, P. Facial nerve palsy after COVID-19 vaccination - A rare association or a coincidence. *Indian J. Ophthalmol.* **2021**, 69, 2550–2552, doi:10.4103/ijo.IJO\_1658\_21.
  11. Manea, M.M.; Dragoş, D.; Enache, I.; Sirbu, A.G.; Tuta, S. Multiple cranial nerve palsies following COVID-19 vaccination-Case report. *Acta Neurol. Scand.* **2022**, 145, 257–259, doi:10.1111/ane.13548.
  12. Martin-Villares, C.; Vazquez-Feito, A.; Gonzalez-Gimeno, M.J.; de la Nogal-Fernandez, B. Bell's palsy following a single dose of mRNA SARS-CoV-2 vaccine: a case report. *J. Neurol.* **2022**, 269, 47–48, doi:10.1007/s00415-021-10617-3.
  13. Mason, M.C.; Liaqat, A.; Morrow, J.; Basso, R.; Gujrati, Y. Bilateral Facial Nerve Palsy and COVID-19 Vaccination: Causation or Coincidence? *Cureus* **2021**, 13, e17602, doi:10.7759/cureus.17602.
  14. Mussatto, C.C.; Sokol, J.; Alapati, N. Bell's palsy following COVID-19 vaccine administration in HIV+ patient. *Am. J. Ophthalmol. Case Rep.* **2022**, 25, 101259, doi:10.1016/j.ajoc.2022.101259.
  15. Nasuelli, N.A.; De Marchi, F.; Cecchin, M.; De Paoli, I.; Onorato, S.; Pettinaroli, R.; Savoini, G.; Godi, L. A case of acute demyelinating polyradiculoneuropathy with bilateral facial palsy after ChAdOx1 nCoV-19 vaccine. *Neurol. Sci.* **2021**, 42, 4747–4749, doi:10.1007/s10072-021-05467-w.
  16. Nishizawa, Y.; Hoshina, Y.; Baker, V. Bell's palsy following the Ad26.COV2.S COVID-19 vaccination. *QJM* **2021**, 114, 657–658, doi:10.1093/qjmed/hcab143.
  17. Obermann, M.; Krasniqi, M.; Ewers, N.; Fayad, J.; Haeberle, U. Bell's palsy following COVID-19 vaccination with high CSF antibody response. *Neurol. Sci.* **2021**, 42, 4397–4399, doi:10.1007/s10072-021-05496-5.
  18. Pothiawala, S. Bell's Palsy After Second Dose of Moderna COVID-19 Vaccine: Coincidence or Causation? *Acta Med. Litu.* **2021**, 28, 298–301, doi:10.15388/Amed.2021.28.2.7.
  19. Poudel, S.; Nepali, P.; Baniya, S.; Shah, S.; Bogati, S.; Nepal, G.; Ojha, R.; Edaki, O.; Lazovic, G.; Kara, S. Bell's palsy as a possible complication of mRNA-1273 (Moderna) vaccine against COVID-19. *Ann Med Surg (Lond)* **2022**, 78, 103897, doi:10.1016/j.amsu.2022.103897.
  20. Repajic, M.; Lai, X.L.; Xu, P.; Liu, A. Bell's Palsy after second dose of Pfizer COVID-19 vaccination in a patient with history of recurrent Bell's palsy. *Brain Behav. Immun. Health* **2021**, 13, 100217, doi:10.1016/j.bbih.2021.100217.
  21. Shalabi, F.; Lossos, A.; Karussis, D. A case report of unilateral cervical lymphadenopathy and multiple cranial neuropathies following mRNA-COVID-19 vaccination. *BMC Neurol.* **2022**, 22, 369, doi:10.1186/s12883-022-02900-1.
  22. Yu, B.-Y.; Cen, L.-S.; Chen, T.; Yang, T.-H. Bell's palsy after inactivated COVID-19 vaccination in a patient with history of recurrent Bell's palsy: A case report. *World J. Clin. Cases* **2021**, 9, 8274–8279, doi:10.12998/wjcc.v9.i27.8274.
  23. Zhang, H.; Sanchez Gomez, D.; Repajic, M.; Liu, A.K. Another Case of Bell's Palsy Recurrence After Pfizer-BioNTech COVID-19 Vaccination. *Cureus* **2022**, 14, e27422, doi:10.7759/cureus.27422.



24. Andreozzi, V.; D'arco, B.; Pagliano, P.; Toriello, A.; Barone, P. Bilateral facial palsy after COVID-19 vaccination. *Neurol. Sci.* **2022**, *43*, 4069–4079, doi:10.1007/s10072-022-05982-4.
25. Castiglione, J.I.; Crespo, J.M.; Lecchini, L.; Silveira, F.O.; Luis, M.B.; Cotti, N.; Simison, C.J.; Aguirre, F.; Piedrabuena, M.A.; Alonso, R.N.; Azcona, C.L.; Sosa, P.S.; Maldonado, E.; Barroso, F. Bilateral facial palsy with paresthesias, variant of Guillain-Barré syndrome following COVID-19 vaccine: A case series of 9 patients. *Neuromuscul. Disord.* **2022**, *32*, 572–574, doi:10.1016/j.nmd.2022.05.003.
26. Corrêa, D.G.; Cañete, L.A.Q.; Dos Santos, G.A.C.; de Oliveira, R.V.; Brandão, C.O.; da Cruz, L.C.H. Neurological symptoms and neuroimaging alterations related with COVID-19 vaccine: Cause or coincidence? *Clin. Imaging* **2021**, *80*, 348–352, doi:10.1016/j.clinimag.2021.08.021.
27. Hamid, R.; Korkmazer, B.; Kochan Kizilkilic, E.; Arman, G.M.; Ozogul, M.; Kargin, O.A.; Arslan, S.; Kizilkilic, O. Potential Association Between COVID-19 Vaccination and Facial Palsy: Three Cases With Neuroimaging Findings. *Ear Nose Throat J.* **2022**, 1455613221113818, doi:10.1177/01455613221113818.
28. James, J.; Jose, J.; Gafoor, V.A.; Smita, B.; Balaram, N. Guillain-Barré syndrome following ChAdOx1 nCoV-19 COVID-19 vaccination: A case series. *Neurol. Clin. Neurosci.* **2021**, *9*, 402–405, doi:10.1111/ncn3.12537.
29. Mirmosayyeb, O.; Barzegar, M.; Rezaei, M.; Baharlouie, N.; Shaygannejad, V. Bell's palsy after Sputnik V COVID-19 (Gam-COVID-Vac) vaccination. *Clin. Case Rep.* **2022**, *10*, e05468, doi:10.1002/ccr3.5468.
30. Shemer, A.; Pras, E.; Einan-Lifshitz, A.; Dubinsky-Pertzov, B.; Hecht, I. Association of COVID-19 Vaccination and Facial Nerve Palsy: A Case-Control Study. *JAMA Otolaryngol. Head Neck Surg.* **2021**, *147*, 739–743, doi:10.1001/jamaoto.2021.1259.
31. Patone, M.; Handunnetthi, L.; Saatci, D.; Pan, J.; Katikireddi, S.V.; Razvi, S.; Hunt, D.; Mei, X.W.; Dixon, S.; Zaccardi, F.; Khunti, K.; Watkinson, P.; Coupland, C.A.C.; Doidge, J.; Harrison, D.A.; Ramanan, R.; Sheikh, A.; Robertson, C.; Hippisley-Cox, J. Neurological complications after first dose of COVID-19 vaccines and SARS-CoV-2 infection. *Nat. Med.* **2021**, *27*, 2144–2153, doi:10.1038/s41591-021-01556-7.
32. Ab Rahman, N.; Lim, M.T.; Lee, F.Y.; Lee, S.C.; Ramli, A.; Saharudin, S.N.; King, T.L.; Anak Jam, E.B.; Ayub, N.A.; Sevalingam, R.K.; Bahari, R.; Ibrahim, N.N.; Mahmud, F.; Sivasampu, S.; Peariasamy, K.M.; SAFECOVAC study group Risk of serious adverse events after the BNT162b2, CoronaVac, and ChAdOx1 vaccines in Malaysia: A self-controlled case series study. *Vaccine* **2022**, *40*, 4394–4402, doi:10.1016/j.vaccine.2022.05.075.
33. Walker, J.L.; Schultze, A.; Tazare, J.; Tamborska, A.; Singh, B.; Donegan, K.; Stowe, J.; Morton, C.E.; Hulme, W.J.; Curtis, H.J.; Williamson, E.J.; Mehrkar, A.; Eggo, R.M.; Rentsch, C.T.; Mathur, R.; Bacon, S.; Walker, A.J.; Davy, S.; Evans, D.; Inglesby, P.; McDonald, H.I. Safety of COVID-19 vaccination and acute neurological events: A self-controlled case series in England using the OpenSAFELY platform. *Vaccine* **2022**, *40*, 4479–4487, doi:10.1016/j.vaccine.2022.06.010.
34. Wan, E.Y.F.; Chui, C.S.L.; Lai, F.T.T.; Chan, E.W.Y.; Li, X.; Yan, V.K.C.; Gao, L.; Yu, Q.; Lam, I.C.H.; Chun, R.K.C.; Cowling, B.J.; Fong, W.C.; Lau, A.Y.L.; Mok, V.C.T.; Chan, F.L.F.; Lee, C.K.; Chan, L.S.T.; Lo, D.; Lau, K.K.; Hung, I.F.N.; Wong, I.C.K. Bell's palsy following vaccination with mRNA (BNT162b2) and inactivated (CoronaVac) SARS-CoV-2 vaccines: a case series and nested case-

- control study. *Lancet Infect. Dis.* **2022**, *22*, 64–72, doi:10.1016/S1473-3099(21)00451-5.
35. Wan, E.Y.F.; Chui, C.S.L.; Ng, V.W.S.; Wang, Y.; Yan, V.K.C.; Lam, I.C.H.; Fan, M.; Lai, F.T.T.; Chan, E.W.Y.; Li, X.; Wong, C.K.H.; Chung, R.K.C.; Cowling, B.J.; Fong, W.C.; Lau, A.Y.L.; Mok, V.C.T.; Chan, F.L.F.; Lee, C.K.; Chan, L.S.T.; Lo, D.; Wong, I.C.K. mRNA (BNT162b2) COVID-19 vaccination increased risk of Bell's palsy: a nested case control and self-controlled case series study. *Clin. Infect. Dis.* **2022**, doi:10.1093/cid/ciac460.
  36. Bardenheier, B.H.; Gravenstein, S.; Blackman, C.; Gutman, R.; Sarkar, I.N.; Feifer, R.A.; White, E.M.; McConeghy, K.; Nanda, A.; Bosco, E.; Mor, V. Adverse Events Following One Dose of mRNA COVID-19 Vaccination Among US Nursing Home Residents With and Without a Previous SARS-CoV-2 Infection. *J. Am. Med. Dir. Assoc.* **2021**, *22*, 2228–2232, doi:10.1016/j.jamda.2021.08.024.
  37. Bardenheier, B.H.; Gravenstein, S.; Blackman, C.; Gutman, R.; Sarkar, I.N.; Feifer, R.A.; White, E.M.; McConeghy, K.; Nanda, A.; Mor, V. Adverse events following mRNA SARS-CoV-2 vaccination among U.S. nursing home residents. *Vaccine* **2021**, *39*, 3844–3851, doi:10.1016/j.vaccine.2021.05.088.
  38. Clemens, S.A.C.; Fortaleza, C.M.C.B.; Crowe, M.; Pollard, A.; Tasca, K.I.; Grotto, R.M.T.; Martins, M.R.; Spadaro, A.G.; Barretti, P.; Verstraeten, T.; Clemens, R. Safety of the Fiocruz ChAdOx COVID-19 vaccine used in a mass vaccination campaign in Botucatu, Brazil. *Vaccine* **2022**, *40*, 6722–6729, doi:10.1016/j.vaccine.2022.08.026.
  39. Frontera, J.A.; Tamborska, A.A.; Doheim, M.F.; Garcia-Azorin, D.; Gezegen, H.; Guekht, A.; Yusof Khan, A.H.K.; Santacatterina, M.; Sejvar, J.; Thakur, K.T.; Westenberg, E.; Winkler, A.S.; Beghi, E.; contributors from the Global COVID-19 Neuro Research Coalition Neurological Events Reported after COVID-19 Vaccines: An Analysis of VAERS. *Ann. Neurol.* **2022**, *91*, 756–771, doi:10.1002/ana.26339.
  40. Huh, K.; Kim, Y.E.; Radnaabaatar, M.; Lee, D.H.; Kim, D.W.; Shin, S.A.; Jung, J. Estimating Baseline Incidence of Conditions Potentially Associated with Vaccine Adverse Events: a Call for Surveillance System Using the Korean National Health Insurance Claims Data. *J. Korean Med. Sci.* **2021**, *36*, e67, doi:10.3346/jkms.2021.36.e67.
  41. Kant, A.; Jansen, J.; van Balveren, L.; van Hunsel, F. Description of Frequencies of Reported Adverse Events Following Immunization Among Four Different COVID-19 Vaccine Brands. *Drug Saf.* **2022**, *45*, 319–331, doi:10.1007/s40264-022-01151-w.
  42. Koh, J.S.; Hoe, R.H.M.; Yong, M.H.; Chiew, H.J.; Goh, Y.; Yong, K.P.; Tu, T.M.; Chan, D.W.S.; Tan, B.Y.-Q.; Yeo, L.L.L.; Quek, A.M.L.; Siow, I.; Saini, M.; Angon, J.; Rathakrishnan, S.; Chen, G.J.; Hui, A.C.-F.; Ahmad, A.; Shwe, M.P.; Tan, K.; Umapathi, T. Hospital-based observational study of neurological disorders in patients recently vaccinated with COVID-19 mRNA vaccines. *J. Neurol. Sci.* **2021**, *430*, 120030, doi:10.1016/j.jns.2021.120030.
  43. Lai, F.T.T.; Chua, G.T.; Chan, E.W.W.; Huang, L.; Kwan, M.Y.W.; Ma, T.; Qin, X.; Chui, C.S.L.; Li, X.; Wan, E.Y.F.; Wong, C.K.H.; Chan, E.W.Y.; Wong, I.C.K.; Ip, P. Adverse events of special interest following the use of BNT162b2 in adolescents: a population-based retrospective cohort study. *Emerg. Microbes Infect.* **2022**, *11*, 885–893, doi:10.1080/22221751.2022.2050952.
  44. Li, X.; Raventós, B.; Roel, E.; Pistillo, A.; Martinez-Hernandez, E.; Delmestri, A.; Reyes, C.; Strauss, V.; Prieto-Alhambra, D.; Burn, E.; Duarte-Salles, T. Association between covid-19 vaccination, SARS-CoV-2 infection, and risk of immune mediated neurological events: population based cohort

- and self-controlled case series analysis. *BMJ* **2022**, *376*, e068373, doi:10.1136/bmj-2021-068373.
45. Nasreen, S.; Calzavara, A.; Buchan, S.A.; Thampi, N.; Johnson, C.; Wilson, S.E.; Kwong, J.C.; Canadian Immunization Research Network (CIRN) Provincial Collaborative Network (PCN) Ontario investigators Background incidence rates of adverse events of special interest related to COVID-19 vaccines in Ontario, Canada, 2015 to 2020, to inform COVID-19 vaccine safety surveillance. *Vaccine* **2022**, *40*, 3305–3312, doi:10.1016/j.vaccine.2022.04.065.
  46. Shibli, R.; Barnett, O.; Abu-Full, Z.; Gronich, N.; Najjar-Debbiny, R.; Doweck, I.; Rennert, G.; Saliba, W. Association between vaccination with the BNT162b2 mRNA COVID-19 vaccine and Bell's palsy: a population-based study. *Lancet Reg. Health Eur.* **2021**, *11*, 100236, doi:10.1016/j.lanepe.2021.100236.
  47. Wong, C.K.H.; Lau, K.T.K.; Xiong, X.; Au, I.C.H.; Lai, F.T.T.; Wan, E.Y.F.; Chui, C.S.L.; Li, X.; Chan, E.W.Y.; Gao, L.; Cheng, F.W.T.; Tang, S.C.W.; Wong, I.C.K. Adverse events of special interest and mortality following vaccination with mRNA (BNT162b2) and inactivated (CoronaVac) SARS-CoV-2 vaccines in Hong Kong: A retrospective study. *PLoS Med.* **2022**, *19*, e1004018, doi:10.1371/journal.pmed.1004018.
  48. Xu, S.; Hong, V.; Sy, L.S.; Glenn, S.C.; Ryan, D.S.; Morrisette, K.L.; Nelson, J.C.; Hambidge, S.J.; Crane, B.; Zerbo, O.; DeSilva, M.B.; Glanz, J.M.; Donahue, J.G.; Liles, E.; Duffy, J.; Qian, L. Changes in incidence rates of outcomes of interest in vaccine safety studies during the COVID-19 pandemic. *Vaccine* **2022**, *40*, 3150–3158, doi:10.1016/j.vaccine.2022.04.037.
  49. Nosedà, R.; Ripellino, P.; Ghidossi, S.; Bertoli, R.; Ceschi, A. Reporting of Acute Inflammatory Neuropathies with COVID-19 Vaccines: Subgroup Disproportionality Analyses in VigiBase. *Vaccines (Basel)* **2021**, *9*, doi:10.3390/vaccines9091022.
  50. El-Shitany, N.A.; Bagher, A.M.; Binmahfouz, L.S.; Eid, B.G.; Almukadi, H.; Badr-Eldin, S.M.; El-Hamamsy, M.; Mohammedsaleh, Z.M.; Saleh, F.M.; Almuhayawi, M.S.; Alghamdi, S.A.; Arab, R.A.; Ali, S.S.; Harakeh, S.; Alghamdi, B.S. The Adverse Reactions of Pfizer BioNTech COVID-19 Vaccine Booster Dose are Mild and Similar to the Second Dose Responses: A Retrospective Cross-Sectional Study. *Int. J. Gen. Med.* **2022**, *15*, 6821–6836, doi:10.2147/IJGM.S376316.
  51. El-Shitany, N.A.; Harakeh, S.; Badr-Eldin, S.M.; Bagher, A.M.; Eid, B.; Almukadi, H.; Alghamdi, B.S.; Alahmadi, A.A.; Hassan, N.A.; Sindi, N.; Alghamdi, S.A.; Almohaimeed, H.M.; Mohammedsaleh, Z.M.; Al-Shaikh, T.M.; Almuhayawi, M.S.; Ali, S.S.; El-Hamamsy, M. Minor to Moderate Side Effects of Pfizer-BioNTech COVID-19 Vaccine Among Saudi Residents: A Retrospective Cross-Sectional Study. *Int. J. Gen. Med.* **2021**, *14*, 1389–1401, doi:10.2147/IJGM.S310497.
  52. Mohammed, R.A.; Garout, R.M.; Wahid, S.; Ayub, F.; Firas ZinAlldin, L.M.; Sultan, I. A Survey on the Side Effects of Pfizer/BioNTech COVID-19 Vaccine Among Vaccinated Adults in Saudi Arabia. *Cureus* **2021**, *13*, e19222, doi:10.7759/cureus.19222.
